# Supplementary material for: Silver Nanostructured Substrates in LDI-MS of Low Molecular Weight Compounds
Source: MDPI journal article supplement (doi:10.3390/ma15134660), 2022-07-02
Supplement: s1 [file s1]

Supplementary material for manuscript entitled 'Silver nanostructured substrates in LDI-MS  
of low molecular weight compounds'

by Gulyaim Sagandykova, Piotr Piszczek, Aleksandra Radtke, Radik Mametov, Oleksandra  
Pryshchepa, Dorota Gabryś, Mateusz Kolankowski and Paweł Pomastowski

**Table S1.** The  $m/z$  values for compounds detected using LDI-MS nanostructured substrates

| Compound                 | $m/z$  | [M]                     |
|--------------------------|--------|-------------------------|
| <i>plate AgPs0.02</i>    |        |                         |
| <b>14:0-13:0-14:0 TG</b> | 820.13 | $[M+^{107}\text{Ag}]^+$ |
| <b>14:0-15:1-14:0 TG</b> | 848.35 | $[M+^{109}\text{Ag}]^+$ |
| <b>14:0-17:1-14:0 TG</b> | 874.54 | $[M+^{107}\text{Ag}]^+$ |
| <b>16:0-15:1-16:0 TG</b> | 904.63 | $[M+^{109}\text{Ag}]^+$ |
| <b>16:0-17:1-16:0 TG</b> | 932.88 | $[M+^{109}\text{Ag}]^+$ |
| <b>16:0-19:2-16:0 TG</b> | 958.10 | $[M+^{109}\text{Ag}]^+$ |
| <b>18:1-17:1-18:1 TG</b> | 876.57 | $[M+H]^+$               |
| <b>18:1-19:2-18:1 TG</b> | 902.78 | $[M+H]^+$               |
| <b>adonitol</b>          | 258.98 | $[M+^{107}\text{Ag}]^+$ |
| <b>cholesterol</b>       | 493.41 | $[M+^{107}\text{Ag}]^+$ |
| <b>alanine</b>           | 195.96 | $[M+^{107}\text{Ag}]^+$ |
| <b>fructose</b>          | 286.97 | $[M+^{107}\text{Ag}]^+$ |
| <b>glucose</b>           | 286.96 | $[M+^{107}\text{Ag}]^+$ |
| <b>methionine</b>        | 255.97 | $[M+^{107}\text{Ag}]^+$ |
| <b>palmitic acid</b>     | 363.14 | $[M+^{107}\text{Ag}]^+$ |
| <b>oleic acid</b>        | 389.16 | $[M+^{107}\text{Ag}]^+$ |
| <b>phenylalanine</b>     | 271.99 | $[M+^{107}\text{Ag}]^+$ |
| <b>serine</b>            | 211.59 | $[M+^{107}\text{Ag}]^+$ |
| <b>shikimic acid</b>     | 281.00 | $[M+^{107}\text{Ag}]^+$ |
| <b>17:0-14-1 PE</b>      | 677.42 | $[M-3H]^-$              |
| <b>17:0-16:1 PE</b>      | 705.39 | $[M-3H]^-$              |
| <b>17:0-18:1 PE</b>      | 733.37 | $[M-3H]^-$              |
| <b>17:0-20:3 PE</b>      | 757.34 | $[M-3H]^-$              |
| <b>17:0-22:4 PE</b>      | 783.34 | $[M-3H]^-$              |
| <b>adonitol</b>          | 152.36 | $[M]^{*-}$              |

|                       |        |                                     |
|-----------------------|--------|-------------------------------------|
| alanine               | 90.65  | [M] <sup>*-</sup>                   |
| fructose              | 180.01 | [M] <sup>*-</sup>                   |
| glucose               | 180.21 | [M] <sup>*-</sup>                   |
| palmitic acid         | 255.41 | [M] <sup>*-</sup>                   |
| oleic acid            | 281.31 | [M] <sup>*-</sup>                   |
| phenylalanine         | 165.44 | [M] <sup>*-</sup>                   |
| serine                | 106.07 | [M] <sup>*-</sup>                   |
| shikimic acid         | 173.94 | [M] <sup>*-</sup>                   |
| <hr/>                 |        |                                     |
| <i>plate AgPs0.03</i> |        |                                     |
| <hr/>                 |        |                                     |
| 14:0-13:0-14:0 TG     | 736.03 | [M+Na] <sup>+</sup>                 |
| 14:0-15:1-14:0 TG     | 846.74 | [M+ <sup>107</sup> Ag] <sup>+</sup> |
| 14:0-17:1-14:0 TG     | 790.90 | [M+Na] <sup>+</sup>                 |
| 16:0-15:1-16:0 TG     | 818.82 | [M+Na] <sup>+</sup>                 |
| 16:0-17:1-16:0 TG     | 846.74 | [M+Na] <sup>+</sup>                 |
| 16:0-19:2-16:0 TG     | 872.65 | [M+Na] <sup>+</sup>                 |
| 18:1-17:1-18:1 TG     | 898.89 | [M+Na] <sup>+</sup>                 |
| 18:1-19:2-18:1 TG     | 924.44 | [M+Na] <sup>+</sup>                 |
| 18:1-21:2-18:1 TG     | 968.54 | [M+K] <sup>+</sup>                  |
| adonitol              | 258.98 | [M+ <sup>107</sup> Ag] <sup>+</sup> |
| cholesterol           | 493.38 | [M+ <sup>107</sup> Ag] <sup>+</sup> |
| alanine               | 195.96 | [M+ <sup>107</sup> Ag] <sup>+</sup> |
| fructose              | 286.98 | [M+ <sup>107</sup> Ag] <sup>+</sup> |
| glucose               | 286.97 | [M+ <sup>107</sup> Ag] <sup>+</sup> |
| methionine            | 255.92 | [M+ <sup>107</sup> Ag] <sup>+</sup> |
| palmitic acid         | 363.13 | [M+ <sup>107</sup> Ag] <sup>+</sup> |
| oleic acid            | 389.15 | [M+ <sup>107</sup> Ag] <sup>+</sup> |
| phenylalanine         | 271.99 | [M+ <sup>107</sup> Ag] <sup>+</sup> |
| serine                | 211.91 | [M+ <sup>107</sup> Ag] <sup>+</sup> |
| shikimic acid         | 280.97 | [M+ <sup>107</sup> Ag] <sup>+</sup> |
| 17:0-14-1 PE          | 677.75 | [M-3H] <sup>-</sup>                 |
| 17:0-16:1 PE          | 705.76 | [M-3H] <sup>-</sup>                 |
| 17:0-18:1 PE          | 733.80 | [M-3H] <sup>-</sup>                 |
| 17:0-20:3 PE          | 757.83 | [M-3H] <sup>-</sup>                 |
| 17:0-22:4 PE          | 783.88 | [M-3H] <sup>-</sup>                 |
| adonitol              | 152.34 | [M] <sup>*-</sup>                   |

|                          |        |                  |
|--------------------------|--------|------------------|
| <b>cholesterol</b>       | 385.83 | $[M]^{*-}$       |
| <b>alanine</b>           | 89.97  | $[M]^{*-}$       |
| <b>fructose</b>          | 180.01 | $[M]^{*-}$       |
| <b>glucose</b>           | 180.29 | $[M]^{*-}$       |
| <b>methionine</b>        | 149.63 | $[M]^{*-}$       |
| <b>palmitic acid</b>     | 256.58 | $[M]^{*-}$       |
| <b>oleic acid</b>        | 281.31 | $[M]^{*-}$       |
| <b>phenylalanine</b>     | 165.46 | $[M]^{*-}$       |
| <b>serine</b>            | 105.96 | $[M]^{*-}$       |
| <b>shikimic acid</b>     | 174.00 | $[M]^{*-}$       |
| <i>plate AgPs0.04</i>    |        |                  |
| <b>14:0-13:0-14:0 TG</b> | 736.20 | $[M+Na]^+$       |
| <b>14:0-15:1-14:0 TG</b> | 762.11 | $[M+Na]^+$       |
| <b>14:0-17:1-14:0 TG</b> | 790.00 | $[M+Na]^+$       |
| <b>16:0-15:1-16:0 TG</b> | 818.87 | $[M+Na]^+$       |
| <b>16:0-17:1-16:0 TG</b> | 846.73 | $[M+Na]^+$       |
| <b>16:0-19:2-16:0 TG</b> | 872.56 | $[M+Na]^+$       |
| <b>18:1-17:1-18:1 TG</b> | 898.38 | $[M+Na]^+$       |
| <b>18:1-19:2-18:1 TG</b> | 924.17 | $[M+Na]^+$       |
| <b>18:1-21:2-18:1 TG</b> | 952.81 | $[M+H]^+$        |
| <b>adonitol</b>          | 258.97 | $[M+^{107}Ag]^+$ |
| <b>cholesterol</b>       | 493.28 | $[M+^{107}Ag]^+$ |
| <b>alanine</b>           | 195.97 | $[M+^{107}Ag]^+$ |
| <b>fructose</b>          | 286.96 | $[M+^{107}Ag]^+$ |
| <b>glucose</b>           | 286.97 | $[M+^{107}Ag]^+$ |
| <b>methionine</b>        | 255.98 | $[M+^{107}Ag]^+$ |
| <b>palmitic acid</b>     | 363.44 | $[M+^{107}Ag]^+$ |
| <b>oleic acid</b>        | 389.09 | $[M+^{107}Ag]^+$ |
| <b>phenylalanine</b>     | 272.00 | $[M+^{107}Ag]^+$ |
| <b>serine</b>            | 211.83 | $[M+^{107}Ag]^+$ |
| <b>shikimic acid</b>     | 280.97 | $[M+^{107}Ag]^+$ |
| <b>15:0 LPC</b>          | 487.12 | $[M+H]^+$        |
| <b>17:0 LPC</b>          | 515.47 | $[M+H]^+$        |
| <b>19:0 LPC</b>          | 543.01 | $[M+H]^+$        |
| <b>adonitol</b>          | 152.24 | $[M]^{*-}$       |

|                                   |        |                                     |
|-----------------------------------|--------|-------------------------------------|
| cholesterol                       | 385.83 | [M] <sup>*--</sup>                  |
| alanine                           | 90.16  | [M] <sup>*--</sup>                  |
| fructose                          | 180.36 | [M] <sup>*--</sup>                  |
| glucose                           | 180.32 | [M] <sup>*--</sup>                  |
| methionine                        | 149.57 | [M] <sup>*--</sup>                  |
| palmitic acid                     | 255.51 | [M] <sup>*--</sup>                  |
| oleic acid                        | 281.38 | [M] <sup>*--</sup>                  |
| phenylalanine                     | 165.41 | [M] <sup>*--</sup>                  |
| serine                            | 106.01 | [M] <sup>*--</sup>                  |
| shikimic acid                     | 173.96 | [M] <sup>*--</sup>                  |
| <hr/> <i>plate AgPs0.06</i> <hr/> |        |                                     |
| <b>14:0-13:0-14:0 TG</b>          | 736.24 | [M+Na] <sup>+</sup>                 |
| <b>14:0-15:1-14:0 TG</b>          | 846.78 | [M+ <sup>107</sup> Ag] <sup>+</sup> |
| <b>14:0-17:1-14:0 TG</b>          | 790.05 | [M+Na] <sup>+</sup>                 |
| <b>16:0-15:1-16:0 TG</b>          | 818.93 | [M+Na] <sup>+</sup>                 |
| <b>16:0-17:1-16:0 TG</b>          | 846.78 | [M+Na] <sup>+</sup>                 |
| <b>16:0-19:2-16:0 TG</b>          | 872.62 | [M+Na] <sup>+</sup>                 |
| <b>18:1-17:1-18:1 TG</b>          | 898.44 | [M+Na] <sup>+</sup>                 |
| <b>18:1-19:2-18:1 TG</b>          | 924.25 | [M+Na] <sup>+</sup>                 |
| <b>18:1-21:2-18:1 TG</b>          | 952.02 | [M+Na] <sup>+</sup>                 |
| adonitol                          | 258.97 | [M+ <sup>107</sup> Ag] <sup>+</sup> |
| cholesterol                       | 493.65 | [M+ <sup>107</sup> Ag] <sup>+</sup> |
| alanine                           | 195.96 | [M+ <sup>107</sup> Ag] <sup>+</sup> |
| fructose                          | 286.97 | [M+ <sup>107</sup> Ag] <sup>+</sup> |
| glucose                           | 286.96 | [M+ <sup>107</sup> Ag] <sup>+</sup> |
| methionine                        | 255.96 | [M+ <sup>107</sup> Ag] <sup>+</sup> |
| palmitic acid                     | 363.45 | [M+ <sup>107</sup> Ag] <sup>+</sup> |
| oleic acid                        | 389.03 | [M+ <sup>107</sup> Ag] <sup>+</sup> |
| phenylalanine                     | 271.99 | [M+ <sup>107</sup> Ag] <sup>+</sup> |
| serine                            | 211.97 | [M+ <sup>107</sup> Ag] <sup>+</sup> |
| shikimic acid                     | 280.95 | [M+ <sup>107</sup> Ag] <sup>+</sup> |
| adonitol                          | 152.36 | [M] <sup>*--</sup>                  |
| cholesterol                       | 385.82 | [M] <sup>*--</sup>                  |
| alanine                           | 90.34  | [M] <sup>*--</sup>                  |
| fructose                          | 180.11 | [M] <sup>*--</sup>                  |

|                          |        |                                     |
|--------------------------|--------|-------------------------------------|
| glucose                  | 180.15 | [M] <sup>*-</sup>                   |
| methionine               | 149.42 | [M] <sup>*-</sup>                   |
| palmitic acid            | 255.41 | [M] <sup>*-</sup>                   |
| oleic acid               | 281.03 | [M] <sup>*-</sup>                   |
| phenylalanine            | 165.46 | [M] <sup>*-</sup>                   |
| serine                   | 106.04 | [M] <sup>*-</sup>                   |
| shikimic acid            | 174.07 | [M] <sup>*-</sup>                   |
| <hr/>                    |        |                                     |
| <i>plate AgPs0.11</i>    |        |                                     |
| <hr/>                    |        |                                     |
| <b>14:0-13:0-14:0 TG</b> | 736.71 | [M+Na] <sup>+</sup>                 |
| <b>14:0-15:1-14:0 TG</b> | 762.72 | [M+Na] <sup>+</sup>                 |
| <b>14:0-17:1-14:0 TG</b> | 790.75 | [M+Na] <sup>+</sup>                 |
| <b>16:0-15:1-16:0 TG</b> | 818.74 | [M+Na] <sup>+</sup>                 |
| <b>16:0-17:1-16:0 TG</b> | 846.81 | [M+Na] <sup>+</sup>                 |
| <b>16:0-19:2-16:0 TG</b> | 872.77 | [M+Na] <sup>+</sup>                 |
| <b>18:1-17:1-18:1 TG</b> | 898.81 | [M+Na] <sup>+</sup>                 |
| <b>18:1-19:2-18:1 TG</b> | 924.83 | [M+Na] <sup>+</sup>                 |
| <b>18:1-21:2-18:1 TG</b> | 952.85 | [M+Na] <sup>+</sup>                 |
| adonitol                 | 258.45 | [M+ <sup>107</sup> Ag] <sup>+</sup> |
| cholesterol              | 493.62 | [M+ <sup>107</sup> Ag] <sup>+</sup> |
| alanine                  | 195.98 | [M+ <sup>107</sup> Ag] <sup>+</sup> |
| fructose                 | 286.99 | [M+ <sup>107</sup> Ag] <sup>+</sup> |
| glucose                  | 286.96 | [M+ <sup>107</sup> Ag] <sup>+</sup> |
| methionine               | 255.96 | [M+ <sup>107</sup> Ag] <sup>+</sup> |
| palmitic acid            | 363.11 | [M+ <sup>107</sup> Ag] <sup>+</sup> |
| oleic acid               | 389.35 | [M+ <sup>107</sup> Ag] <sup>+</sup> |
| phenylalanine            | 271.99 | [M+ <sup>107</sup> Ag] <sup>+</sup> |
| serine                   | 211.81 | [M+ <sup>107</sup> Ag] <sup>+</sup> |
| shikimic acid            | 280.95 | [M+ <sup>107</sup> Ag] <sup>+</sup> |
| adonitol                 | 152.38 | [M] <sup>*-</sup>                   |
| cholesterol              | 385.43 | [M] <sup>*-</sup>                   |
| alanine                  | 89.78  | [M] <sup>*-</sup>                   |
| fructose                 | 180.24 | [M] <sup>*-</sup>                   |
| glucose                  | 180.20 | [M] <sup>*-</sup>                   |
| methionine               | 149.40 | [M] <sup>*-</sup>                   |
| palmitic acid            | 255.38 | [M] <sup>*-</sup>                   |

|                                   |        |                                     |
|-----------------------------------|--------|-------------------------------------|
| oleic acid                        | 281.29 | [M] <sup>*-</sup>                   |
| phenylalanine                     | 165.22 | [M] <sup>*-</sup>                   |
| serine                            | 105.27 | [M] <sup>*-</sup>                   |
| shikimic acid                     | 174.06 | [M] <sup>*-</sup>                   |
| 17:0-14:1 PE                      | 678.25 | [M-2H] <sup>-</sup>                 |
| 17:0-16:1 PE                      | 706.24 | [M-2H] <sup>-</sup>                 |
| 17:0-18:1 PE                      | 734.24 | [M-2H] <sup>-</sup>                 |
| 17:0-20:3 PE                      | 758.23 | [M-2H] <sup>-</sup>                 |
| 17:0-22:4 PE                      | 784.25 | [M-2H] <sup>-</sup>                 |
| 14:0-13:0-14:0 TG                 | 711.23 | [M-2H] <sup>-</sup>                 |
| 14:0-15:1-14:0 TG                 | 737.23 | [M-2H] <sup>-</sup>                 |
| 14:0-17:1-14:0 TG                 | 765.26 | [M-2H] <sup>-</sup>                 |
| 16:0-15:1-16:0 TG                 | 793.29 | [M-2H] <sup>-</sup>                 |
| 16:0-17:1-16:0 TG                 | 821.34 | [M-2H] <sup>-</sup>                 |
| 16:0-19:2-16:0 TG                 | 847.38 | [M-2H] <sup>-</sup>                 |
| 18:1-17:1-18:1 TG                 | 873.42 | [M-2H] <sup>-</sup>                 |
| 18:1-19:2-18:1 TG                 | 899.48 | [M-2H] <sup>-</sup>                 |
| <hr/> <i>plate AgPs0.17</i> <hr/> |        |                                     |
| 14:0-15:1-14:0 TG                 | 846.35 | [M+ <sup>107</sup> Ag] <sup>+</sup> |
| 14:0-17:1-14:0 TG                 | 874.26 | [M+ <sup>107</sup> Ag] <sup>+</sup> |
| 16:0-15:1-16:0 TG                 | 818.27 | [M+Na] <sup>+</sup>                 |
| 16:0-17:1-16:0 TG                 | 846.72 | [M+Na] <sup>+</sup>                 |
| 16:0-19:2-16:0 TG                 | 872.42 | [M+Na] <sup>+</sup>                 |
| 18:1-17:1-18:1 TG                 | 898.53 | [M+Na] <sup>+</sup>                 |
| 18:1-19:2-18:1 TG                 | 902.38 | [M+H] <sup>+</sup>                  |
| 18:1-21:2-18:1 TG                 | 930.55 | [M+H] <sup>+</sup>                  |
| adonitol                          | 259.00 | [M+ <sup>107</sup> Ag] <sup>+</sup> |
| cholesterol                       | 493.20 | [M+ <sup>107</sup> Ag] <sup>+</sup> |
| alanine                           | 195.96 | [M+ <sup>107</sup> Ag] <sup>+</sup> |
| fructose                          | 286.99 | [M+ <sup>107</sup> Ag] <sup>+</sup> |
| glucose                           | 286.99 | [M+ <sup>107</sup> Ag] <sup>+</sup> |
| methionine                        | 255.98 | [M+ <sup>107</sup> Ag] <sup>+</sup> |
| palmitic acid                     | 363.14 | [M+ <sup>107</sup> Ag] <sup>+</sup> |
| oleic acid                        | 389.06 | [M+ <sup>107</sup> Ag] <sup>+</sup> |
| phenylalanine                     | 272.01 | [M+ <sup>107</sup> Ag] <sup>+</sup> |

|                                   |        |                         |
|-----------------------------------|--------|-------------------------|
| serine                            | 211.76 | $[M+^{107}\text{Ag}]^+$ |
| shikimic acid                     | 280.99 | $[M+^{107}\text{Ag}]^+$ |
| adonitol                          | 152.54 | $[M]^{*-}$              |
| cholesterol                       | 385.79 | $[M]^{*-}$              |
| alanine                           | 90.46  | $[M]^{*-}$              |
| fructose                          | 180.14 | $[M]^{*-}$              |
| glucose                           | 180.11 | $[M]^{*-}$              |
| methionine                        | 149.55 | $[M]^{*-}$              |
| palmitic acid                     | 255.37 | $[M]^{*-}$              |
| oleic acid                        | 281.30 | $[M]^{*-}$              |
| phenylalanine                     | 165.39 | $[M]^{*-}$              |
| serine                            | 106.20 | $[M]^{*-}$              |
| shikimic acid                     | 174.07 | $[M]^{*-}$              |
| <hr/> <i>plate AgPs0.19</i> <hr/> |        |                         |
| 14:0-13:0-14:0 TG                 | 736.63 | $[M+\text{Na}]^+$       |
| 14:0-15:1-14:0 TG                 | 846.76 | $[M+^{107}\text{Ag}]^+$ |
| 14:0-17:1-14:0 TG                 | 790.69 | $[M+\text{Na}]^+$       |
| 16:0-15:1-16:0 TG                 | 818.72 | $[M+\text{Na}]^+$       |
| 16:0-17:1-16:0 TG                 | 846.76 | $[M+\text{Na}]^+$       |
| 16:0-19:2-16:0 TG                 | 872.78 | $[M+\text{Na}]^+$       |
| 18:1-17:1-18:1 TG                 | 898.79 | $[M+\text{Na}]^+$       |
| 18:1-19:2-18:1 TG                 | 924.81 | $[M+\text{Na}]^+$       |
| 18:1-21:2-18:1 TG                 | 952.85 | $[M+\text{Na}]^+$       |
| adonitol                          | 259.00 | $[M+^{107}\text{Ag}]^+$ |
| cholesterol                       | 493.22 | $[M+^{107}\text{Ag}]^+$ |
| alanine                           | 195.77 | $[M+^{107}\text{Ag}]^+$ |
| fructose                          | 286.98 | $[M+^{107}\text{Ag}]^+$ |
| glucose                           | 286.98 | $[M+^{107}\text{Ag}]^+$ |
| methionine                        | 255.97 | $[M+^{107}\text{Ag}]^+$ |
| palmitic acid                     | 363.12 | $[M+^{107}\text{Ag}]^+$ |
| oleic acid                        | 389.05 | $[M+^{107}\text{Ag}]^+$ |
| phenylalanine                     | 271.98 | $[M+^{107}\text{Ag}]^+$ |
| serine                            | 211.80 | $[M+^{107}\text{Ag}]^+$ |
| shikimic acid                     | 280.95 | $[M+^{107}\text{Ag}]^+$ |
| adonitol                          | 152.39 | $[M]^{*-}$              |

|                                  |        |                                     |
|----------------------------------|--------|-------------------------------------|
| alanine                          | 90.15  | [M] <sup>*--</sup>                  |
| fructose                         | 180.03 | [M] <sup>*--</sup>                  |
| glucose                          | 180.41 | [M] <sup>*--</sup>                  |
| methionine                       | 149.55 | [M] <sup>*--</sup>                  |
| palmitic acid                    | 255.44 | [M] <sup>*--</sup>                  |
| oleic acid                       | 281.32 | [M] <sup>*--</sup>                  |
| phenylalanine                    | 165.41 | [M] <sup>*--</sup>                  |
| serine                           | 106.17 | [M] <sup>*--</sup>                  |
| shikimic acid                    | 174.51 | [M] <sup>*--</sup>                  |
| <hr/> <i>plate AgPs0.2</i> <hr/> |        |                                     |
| <b>14:0-13:0-14:0 TG</b>         | 736.66 | [M+Na] <sup>+</sup>                 |
| <b>14:0-15:1-14:0 TG</b>         | 762.68 | [M+Na] <sup>+</sup>                 |
| <b>14:0-17:1-14:0 TG</b>         | 790.71 | [M+Na] <sup>+</sup>                 |
| <b>16:0-15:1-16:0 TG</b>         | 818.74 | [M+Na] <sup>+</sup>                 |
| <b>16:0-17:1-16:0 TG</b>         | 846.77 | [M+Na] <sup>+</sup>                 |
| <b>16:0-19:2-16:0 TG</b>         | 872.78 | [M+Na] <sup>+</sup>                 |
| <b>18:1-17:1-18:1 TG</b>         | 898.80 | [M+Na] <sup>+</sup>                 |
| <b>18:1-19:2-18:1 TG</b>         | 924.81 | [M+Na] <sup>+</sup>                 |
| <b>18:1-21:2-18:1 TG</b>         | 952.83 | [M+Na] <sup>+</sup>                 |
| adonitol                         | 258.99 | [M+ <sup>107</sup> Ag] <sup>+</sup> |
| cholesterol                      | 493.36 | [M+ <sup>107</sup> Ag] <sup>+</sup> |
| alanine                          | 195.95 | [M+ <sup>107</sup> Ag] <sup>+</sup> |
| fructose                         | 286.99 | [M+ <sup>107</sup> Ag] <sup>+</sup> |
| glucose                          | 286.99 | [M+ <sup>107</sup> Ag] <sup>+</sup> |
| methionine                       | 255.97 | [M+ <sup>107</sup> Ag] <sup>+</sup> |
| palmitic acid                    | 363.16 | [M+ <sup>107</sup> Ag] <sup>+</sup> |
| oleic acid                       | 389.11 | [M+ <sup>107</sup> Ag] <sup>+</sup> |
| phenylalanine                    | 272.00 | [M+ <sup>107</sup> Ag] <sup>+</sup> |
| serine                           | 211.76 | [M+ <sup>107</sup> Ag] <sup>+</sup> |
| shikimic acid                    | 280.99 | [M+ <sup>107</sup> Ag] <sup>+</sup> |
| adonitol                         | 152.30 | [M] <sup>*--</sup>                  |
| alanine                          | 90.36  | [M] <sup>*--</sup>                  |
| fructose                         | 180.45 | [M] <sup>*--</sup>                  |
| glucose                          | 180.41 | [M] <sup>*--</sup>                  |
| methionine                       | 149.36 | [M] <sup>*--</sup>                  |



|                      |        |              |
|----------------------|--------|--------------|
| <b>palmitic acid</b> | 255.42 | $[M]^{*-}$   |
| <b>oleic acid</b>    | 281.33 | $[M]^{*-}$   |
| <b>phenylalanine</b> | 165.15 | $[M]^{*-}$   |
| <b>serine</b>        | 106.08 | $[M]^{*-}$   |
| <b>shikimic acid</b> | 174.45 | $[M]^{*-}$   |
| <b>17:0-14:1 PE</b>  | 677.90 | $[M-3H]^{-}$ |
| <b>17:0-16:1 PE</b>  | 705.93 | $[M-3H]^{-}$ |
| <b>17:0-18:1 PE</b>  | 733.97 | $[M-3H]^{-}$ |
| <b>17:0-20:3 PE</b>  | 757.99 | $[M-2H]^{-}$ |
| <b>17:0-22:4 PE</b>  | 784.04 | $[M-2H]^{-}$ |

---
